# Supplementary material
Source: PubMed Central journal article supplement (PMC5679090)
Supplement: NIHMS889815-supplement-Supplemental_Data_File__doc__pdf__etc___3.pdf [file NIHMS889815-supplement-Supplemental_Data_File__doc__pdf__etc___3.pdf]

## Statistical Analyses Outputs

### 1. RQ1: Frequency of MRE-Containing Observations

#### 1.1. A sample model fitting and results with one of the imputed datasets

```
lme <- glmer(MREO ~ (ST + POWL + PONM)^2 + (1|Site) + (1|Subject), family = "binomial", data = subset(data.imp, Set == 1))
```

# Variables:

```
# MREO: MRE occurrence. Binary variable.
# ST: Shift type – day shift or night shift.
# POWL: Pre-observation workload.
# PONM: Pre-observation negative mood.
# Site: Three data collection sites (ICUs). Random variable.
# Subject: Nurse participants. Random variable.
# Input data: The first (Set == 1) of the thirty-five imputed datasets (data.imp).
```

Generalized linear mixed model fit by maximum likelihood (Laplace Approximation) ['glmerMod']

```
Family: binomial ( logit )
Formula: MREO ~ (ST + POWL + PONM)^2 + (1 | Site) + (1 | Subject)
Data: subset(data.imp, Set == 1)
```

| AIC   | BIC   | logLik | deviance | df.resid |
|-------|-------|--------|----------|----------|
| 157.3 | 182.6 | -69.6  | 139.3    | 115      |

Scaled residuals:

| Min     | 1Q      | Median  | 3Q     | Max    |
|---------|---------|---------|--------|--------|
| -2.1115 | -0.7177 | -0.4047 | 0.8668 | 2.8325 |

Random effects:

| Groups  | Name        | Variance  | Std.Dev. |
|---------|-------------|-----------|----------|
| Subject | (Intercept) | 1.716e-08 | 0.000131 |
| Site    | (Intercept) | 7.733e-04 | 0.027809 |

Number of obs: 124, groups: Subject, 86; Site, 3

## Fixed effects:

|                    | Estimate   | Std. Error | z value | Pr(> z ) |     |
|--------------------|------------|------------|---------|----------|-----|
| (Intercept)        | -0.6465540 | 0.2436102  | -2.654  | 0.007953 | **  |
| STNight_v_Day      | -0.8410575 | 0.7896462  | -1.065  | 0.286828 |     |
| POWL               | 0.1181889  | 0.0339295  | 3.483   | 0.000495 | *** |
| PONM               | -0.0019074 | 0.0165854  | -0.115  | 0.908440 |     |
| STNight_v_Day:POWL | -0.1249362 | 0.0671429  | -1.861  | 0.062779 | .   |
| STNight_v_Day:PONM | -0.1125081 | 0.0753142  | -1.494  | 0.135215 |     |
| POWL:PONM          | -0.0008303 | 0.0020887  | -0.398  | 0.690982 |     |

---

Signif. codes: 0 '\*\*\*' 0.001 '\*\*' 0.01 '\*' 0.05 '.' 0.1 ' ' 1

## Correlation of Fixed Effects:

|             | (Intr) | STNg__D | POWL   | PONM   | STN__D:POW | STN__D:PON |
|-------------|--------|---------|--------|--------|------------|------------|
| STNght_v_Dy | -0.288 |         |        |        |            |            |
| POWL        | -0.245 | 0.104   |        |        |            |            |
| PONM        | -0.084 | 0.024   | 0.061  |        |            |            |
| STN__D:POWL | 0.158  | -0.225  | -0.516 | -0.010 |            |            |
| STN__D:PONM | 0.032  | 0.722   | 0.005  | -0.221 | -0.094     |            |
| POWL:PONM   | 0.056  | -0.054  | -0.152 | 0.087  | 0.302      | -0.037     |

## 1.2. Results from the same model fittings for the 35 imputed datasets combined with Rubin's rule

The following table presents results when ST was dummy coded with day shift as the reference level.

|   | Variable           | Q      | Adj. OR | W      | B      | T      | df      | t      | 95% CI (Adj. OR) | p        |
|---|--------------------|--------|---------|--------|--------|--------|---------|--------|------------------|----------|
| 1 | (Intercept)        | -0.662 | 0.516   | 0.074  | 0.002  | 0.076  | 117.982 | -2.399 | [0.299, 0.890]   | 0.018 *  |
| 2 | STNight_v_Day      | -0.795 | 0.452   | 0.576  | 0.017  | 0.593  | 118.176 | -1.032 | [0.098, 2.075]   | 0.304    |
| 3 | POWL               | 0.122  | 1.130   | 0.001  | 0.001  | 0.002  | 70.982  | 2.827  | [1.037, 1.231]   | 0.006 ** |
| 4 | PONM               | 0.008  | 1.008   | <0.001 | <0.001 | 0.001  | 47.455  | 0.295  | [0.954, 1.065]   | 0.770    |
| 5 | STNight_v_Day:POWL | -0.116 | 0.890   | 0.005  | 0.001  | 0.005  | 105.857 | -1.605 | [0.772, 1.027]   | 0.112    |
| 6 | STNight_v_Day:PONM | -0.128 | 0.880   | 0.006  | <0.001 | 0.006  | 110.328 | -1.599 | [0.751, 1.031]   | 0.113    |
| 7 | POWL:PONM          | 0.001  | 1.001   | <0.001 | <0.001 | <0.001 | 32.344  | 0.391  | [0.994, 1.009]   | 0.698    |

Note. Q: average of the point estimates. Adj. OR: adjusted odds ratio. W: within-imputation variance. B: between-imputation variance. T: total variance. df: degrees of freedom. CI: confidence interval.

The following table presents results when ST was effects coded with weights -0.5 (day shift) and 0.5 (night shift).

|   | Variable           | Q      | Adj. OR | W      | B      | T      | df      | t      | 95% CI (Adj. OR) | p       |
|---|--------------------|--------|---------|--------|--------|--------|---------|--------|------------------|---------|
| 1 | (Intercept)        | -1.059 | 0.347   | 0.163  | 0.003  | 0.166  | 119.405 | -2.596 | [0.155, 0.778]   | 0.011 * |
| 2 | STNight_v_Day      | -0.795 | 0.452   | 0.576  | 0.017  | 0.593  | 118.177 | -1.032 | [0.098, 2.075]   | 0.304   |
| 3 | POWL               | 0.064  | 1.066   | 0.001  | <0.001 | 0.002  | 89.428  | 1.640  | [0.986, 1.153]   | 0.105   |
| 4 | PONM               | -0.056 | 0.946   | 0.001  | <0.001 | 0.002  | 115.749 | -1.423 | [0.875, 1.022]   | 0.158   |
| 5 | STNight_v_Day:POWL | -0.116 | 0.890   | 0.005  | 0.001  | 0.005  | 105.856 | -1.605 | [0.772, 1.027]   | 0.112   |
| 6 | STNight_v_Day:PONM | -0.128 | 0.880   | 0.006  | <0.001 | 0.006  | 110.325 | -1.599 | [0.751, 1.031]   | 0.113   |
| 7 | POWL:PONM          | 0.001  | 1.001   | <0.001 | <0.001 | <0.001 | 32.344  | 0.391  | [0.994, 1.009]   | 0.698   |

Note. Q: average of the point estimates. Adj. OR: adjusted odds ratio. W: within-imputation variance. B: between-imputation variance. T: total variance. df: degrees of freedom. CI: confidence interval.

## 2. RQ3: Nurses' Activities and Their Correlations with MREs

2.1. Total task volume (TTV) predicted by shift type, pre-observation workload, and pre-observation negative mood

2.1.1. A sample model fitting and results with one of the imputed datasets

```
lme <- lmer(TTV ~ (ST + POWL + PONM)^2 + (1|Site) + (1|Subject), data = subset(data.imp, Set == 1))
```

# Variables:

```
# TTV: Total task volume.
# ST: Shift type – day shift or night shift.
# POWL: Pre-observation workload.
# PONM: Pre-observation negative mood.
# Site: Three data collection sites (ICUs). Random variable.
# Subject: Nurse participants. Random variable.
# Input data: The first (Set == 1) of the thirty-five imputed datasets (data.imp).
```

```
Linear mixed model fit by REML
t-tests use Satterthwaite approximations to degrees of freedom ['lmerMod']
Formula: TTV ~ (ST + POWL + PONM)^2 + (1 | Site) + (1 | Subject)
Data: subset(data.imp, Set == 1)
```

REML criterion at convergence: 1208.9

Scaled residuals:

| Min      | 1Q       | Median   | 3Q      | Max     |
|----------|----------|----------|---------|---------|
| -1.94922 | -0.58015 | -0.03582 | 0.51805 | 2.99957 |

Random effects:

| Groups   | Name        | Variance | Std.Dev. |
|----------|-------------|----------|----------|
| Subject  | (Intercept) | 186.2    | 13.65    |
| Site     | (Intercept) | 0.0      | 0.00     |
| Residual |             | 933.1    | 30.55    |

Number of obs: 124, groups: Subject, 86; Site, 3

## Fixed effects:

|                    | Estimate | Std. Error | df        | t value | Pr(> t )   |
|--------------------|----------|------------|-----------|---------|------------|
| (Intercept)        | -4.39779 | 3.58756    | 75.34000  | -1.226  | 0.22408    |
| STNight_v_Day      | 18.14897 | 8.05934    | 90.45000  | 2.252   | 0.02675 *  |
| POWL               | 1.01661  | 0.37653    | 105.24000 | 2.700   | 0.00808 ** |
| PONM               | -0.02190 | 0.25406    | 116.65000 | -0.086  | 0.93145    |
| STNight_v_Day:POWL | 0.70823  | 0.93641    | 98.85000  | 0.756   | 0.45125    |
| STNight_v_Day:PONM | -0.04896 | 0.60493    | 112.30000 | -0.081  | 0.93564    |
| POWL:PONM          | 0.03856  | 0.02155    | 116.92000 | 1.789   | 0.07615 .  |

Signif. codes: 0 '\*\*\*' 0.001 '\*\*' 0.01 '\*' 0.05 '.' 0.1 ' ' 1

## Correlation of Fixed Effects:

|             | (Intr) | STNg__D | POWL   | PONM   | STN__D:POW | STN__D:PON |
|-------------|--------|---------|--------|--------|------------|------------|
| STNght_v_Dy | -0.440 |         |        |        |            |            |
| POWL        | 0.005  | 0.002   |        |        |            |            |
| PONM        | -0.027 | -0.005  | -0.001 |        |            |            |
| STN__D:POWL | 0.001  | -0.221  | -0.422 | 0.046  |            |            |
| STN__D:PONM | 0.006  | 0.180   | 0.013  | -0.445 | -0.049     |            |
| POWL:PONM   | 0.008  | -0.042  | -0.150 | 0.373  | 0.186      | -0.229     |

## 2.1.2. Results from the same model fittings for the 35 imputed datasets combined with Rubin's rule

The following table presents results when ST was dummy coded with day shift as the reference level.

|   | Variable           | Q      | W      | B     | T      | df      | t      | 95% CI           | p       |
|---|--------------------|--------|--------|-------|--------|---------|--------|------------------|---------|
| 1 | (Intercept)        | -4.772 | 13.439 | 0.526 | 13.980 | 116.716 | -1.276 | [-12.178, 2.633] | 0.204   |
| 2 | STNight_v_Day      | 18.942 | 65.615 | 1.429 | 67.085 | 119.173 | 2.313  | [ 2.724, 35.160] | 0.022 * |
| 3 | POWL               | 1.039  | 0.140  | 0.037 | 0.178  | 85.404  | 2.464  | [ 0.201, 1.877]  | 0.016 * |
| 4 | PONM               | -0.101 | 0.083  | 0.031 | 0.114  | 73.443  | -0.298 | [-0.774, 0.573]  | 0.767   |
| 5 | STNight_v_Day:POWL | 0.621  | 0.877  | 0.032 | 0.910  | 117.107 | 0.651  | [-1.269, 2.510]  | 0.517   |
| 6 | STNight_v_Day:PONM | 0.041  | 0.390  | 0.044 | 0.435  | 105.658 | 0.062  | [-1.266, 1.348]  | 0.951   |
| 7 | POWL:PONM          | 0.033  | <0.001 | 0.001 | 0.001  | 28.053  | 0.902  | [-0.042, 0.109]  | 0.375   |

Note. Q: average of the point estimates. W: within-imputation variance. B: between-imputation variance. T: total variance. df: degrees of freedom. CI: confidence interval.

The following table presents results when ST was effects coded with weights -0.5 (day shift) and 0.5 (night shift).

|   | Variable    | Q      | W      | B     | T      | df      | t      | 95% CI           | p        |
|---|-------------|--------|--------|-------|--------|---------|--------|------------------|----------|
| 1 | (Intercept) | 4.439  | 16.534 | 2.833 | 19.448 | 97.105  | 1.007  | [-4.313, 13.192] | 0.317    |
| 2 | ST          | 18.942 | 65.615 | 1.429 | 67.085 | 119.173 | 2.313  | [ 2.724, 35.160] | 0.022 *  |
| 3 | POWL        | 1.339  | 0.215  | 0.021 | 0.237  | 107.753 | 2.750  | [ 0.374, 2.304]  | 0.007 ** |
| 4 | PONM        | -0.080 | 0.092  | 0.007 | 0.099  | 112.030 | -0.253 | [-0.703, 0.544]  | 0.801    |
| 5 | ST:POWL     | 0.621  | 0.877  | 0.032 | 0.910  | 117.107 | 0.651  | [-1.269, 2.510]  | 0.517    |
| 6 | ST:PONM     | 0.041  | 0.390  | 0.044 | 0.435  | 105.658 | 0.062  | [-1.266, 1.348]  | 0.951    |
| 7 | POWL:PONM   | 0.033  | <0.001 | 0.001 | 0.001  | 28.053  | 0.902  | [-0.042, 0.109]  | 0.375    |

Note. Q: average of the point estimates. W: within-imputation variance. B: between-imputation variance. T: total variance. df: degrees of freedom. CI: confidence interval.

## 2.2. The correlation between TTV and MRE controlling other variables

### 2.2.1. A sample model fitting and results with one of the imputed datasets

```
lme <- lmer(TTV ~ (MREO + ST + POWL + PONM)^2 + (1|Site) + (1|Subject), data = subset(data.imp, Set == 1))
```

```
# Variables:
```

```
# TTV: Total task volume.
```

```
# MREO: MRE occurrence. Binary variable.
```

```
# ST: Shift type – day shift or night shift.
```

```
# POWL: Pre-observation workload.
```

```
# PONM: Pre-observation negative mood.
```

```
# Site: Three data collection sites (ICUs). Random variable.
```

```
# Subject: Nurse participants. Random variable.
```

```
# Input data: The first (Set == 1) of the thirty-five imputed datasets (data.imp).
```

```
Linear mixed model fit by REML
```

```
t-tests use Satterthwaite approximations to degrees of freedom ['lmerMod']
```

```
Formula: TTV ~ (MREO + ST + POWL + PONM)^2 + (1 | Site) + (1 | Subject)
```

```
Data: subset(data.imp, Set == 1)
```

```
REML criterion at convergence: 1184.6
```

```
Scaled residuals:
```

| Min     | 1Q      | Median  | 3Q     | Max    |
|---------|---------|---------|--------|--------|
| -1.9528 | -0.5061 | -0.1019 | 0.4620 | 3.0137 |

```
Random effects:
```

| Groups   | Name        | Variance | Std.Dev. |
|----------|-------------|----------|----------|
| Subject  | (Intercept) | 255.8    | 15.99    |
| Site     | (Intercept) | 0.0      | 0.00     |
| Residual |             | 827.5    | 28.77    |

```
Number of obs: 124, groups: Subject, 86; Site, 3
```

```
Fixed effects:
```

|              | Estimate | Std. Error | df        | t value | Pr(> t )   |
|--------------|----------|------------|-----------|---------|------------|
| (Intercept)  | -1.44496 | 4.71445    | 96.95000  | -0.306  | 0.75988    |
| MREOyes_v_no | 25.30941 | 8.58323    | 111.68000 | 2.949   | 0.00389 ** |
| ST           | 6.81029  | 9.45204    | 97.94000  | 0.721   | 0.47293    |
| POWL         | 1.54729  | 0.50054    | 100.96000 | 3.091   | 0.00258 ** |

```

PONM                0.16183    0.31781 110.20000    0.509  0.61163
MREOyes_v_no:ST    42.23261    17.30716 112.87000    2.440  0.01624 *
MREOyes_v_no:POWL  -0.63496    0.84220 105.68000   -0.754  0.45257
MREOyes_v_no:PONM  0.38812    0.52790  96.76000    0.735  0.46398
ST:POWL            0.79887    0.94208 100.23000    0.848  0.39847
ST:PONM            0.55652    0.63206 106.96000    0.880  0.38057
POWL:PONM          0.03079    0.02189 112.47000    1.406  0.16246

```

---  
Signif. codes: 0 '\*\*\*' 0.001 '\*\*' 0.01 '\*' 0.05 '.' 0.1 ' ' 1

#### Correlation of Fixed Effects:

```

(Intr) MREOy__ ST      POWL    PONM    MREO__S MREO__POW MREO__PON ST:POW ST:PON
MREOyes_v_n -0.478
ST           0.532 -0.268
POWL        -0.136  0.029 -0.259
PONM        -0.013  0.189  0.017  0.006
MREOys__:ST -0.229  0.606 -0.494  0.051  0.176
MREO__:POWL -0.020 -0.167  0.077 -0.384  0.040  0.095
MREO__:PONM  0.022  0.241 -0.034 -0.011 -0.258  0.310  0.028
ST:POWL     -0.250  0.098 -0.158  0.586  0.019 -0.047 -0.012  -0.027
ST:PONM     0.017  0.285 -0.001 -0.017  0.614  0.308  0.021  0.138  -0.025
POWL:PONM   -0.047 -0.048 -0.009  0.021  0.144 -0.093  0.044  -0.266  0.191 -0.241

```

#### 2.2.2. Results from the same model fittings for the 35 imputed datasets combined with Rubin's rule

The following table presents results when MREO was dummy coded with absence of MRE as the reference level.

|    | Variable          | Q      | W       | B     | T       | df      | t      | 95% CI            | p        |
|----|-------------------|--------|---------|-------|---------|---------|--------|-------------------|----------|
| 1  | (Intercept)       | -1.493 | 22.853  | 0.533 | 23.401  | 118.961 | -0.309 | [-11.072, 8.086]  | 0.758    |
| 2  | MREOyes_v_no      | 24.270 | 76.210  | 4.082 | 80.409  | 114.611 | 2.707  | [ 6.507, 42.033]  | 0.008 ** |
| 3  | ST                | 6.533  | 92.025  | 4.239 | 96.385  | 115.715 | 0.665  | [-12.913, 25.978] | 0.507    |
| 4  | POWL              | 1.583  | 0.262   | 0.039 | 0.302   | 100.147 | 2.880  | [ 0.493, 2.674]   | 0.005 ** |
| 5  | PONM              | 0.169  | 0.112   | 0.009 | 0.121   | 110.933 | 0.488  | [-0.519, 0.858]   | 0.627    |
| 6  | MREOyes_v_no:ST   | 41.900 | 299.590 | 5.503 | 305.250 | 119.639 | 2.398  | [ 7.307, 76.493]  | 0.018 *  |
| 7  | MREOyes_v_no:POWL | -0.714 | 0.669   | 0.079 | 0.750   | 105.000 | -0.825 | [-2.432, 1.003]   | 0.411    |
| 8  | MREOyes_v_no:PONM | 0.198  | 0.367   | 0.076 | 0.446   | 92.125  | 0.297  | [-1.128, 1.524]   | 0.767    |
| 9  | ST:POWL           | 0.686  | 0.888   | 0.043 | 0.932   | 115.327 | 0.710  | [-1.227, 2.598]   | 0.479    |
| 10 | ST:PONM           | 0.600  | 0.441   | 0.063 | 0.506   | 101.134 | 0.843  | [-0.812, 2.011]   | 0.401    |
| 11 | POWL:PONM         | 0.030  | 0.001   | 0.001 | 0.002   | 26.046  | 0.734  | [-0.055, 0.115]   | 0.469    |



Note. Q: average of the point estimates. W: within-imputation variance. B: between-imputation variance. T: total variance. df: degrees of freedom. CI: confidence interval.

The following table presents results when MREO was effects coded with weights -0.5 (absence of MRE) and 0.5 (presence of MRE).

|    | Variable    | Q      | W       | B     | T       | df      | t      | 95% CI           | p        |
|----|-------------|--------|---------|-------|---------|---------|--------|------------------|----------|
| 1  | (Intercept) | 10.642 | 21.573  | 1.715 | 23.337  | 110.726 | 2.203  | [ 1.069, 20.215] | 0.030    |
| 2  | MREO        | 24.270 | 76.210  | 4.082 | 80.409  | 114.611 | 2.707  | [ 6.507, 42.033] | 0.008 ** |
| 3  | ST          | 27.483 | 83.843  | 4.887 | 88.870  | 113.910 | 2.915  | [ 8.807, 46.158] | 0.004 ** |
| 4  | POWL        | 1.226  | 0.263   | 0.021 | 0.285   | 110.581 | 2.298  | [ 0.169, 2.284]  | 0.023 *  |
| 5  | PONM        | 0.268  | 0.140   | 0.012 | 0.151   | 110.284 | 0.690  | [-0.503, 1.040]  | 0.492    |
| 6  | MREO:ST     | 41.900 | 299.590 | 5.503 | 305.250 | 119.639 | 2.398  | [ 7.307, 76.493] | 0.018 *  |
| 7  | MREO:POWL   | -0.714 | 0.669   | 0.079 | 0.750   | 105.000 | -0.825 | [-2.432, 1.003]  | 0.411    |
| 8  | MREO:PONM   | 0.198  | 0.367   | 0.076 | 0.446   | 92.125  | 0.297  | [-1.128, 1.524]  | 0.767    |
| 9  | ST:POWL     | 0.686  | 0.888   | 0.043 | 0.932   | 115.327 | 0.710  | [-1.227, 2.598]  | 0.479    |
| 10 | ST:PONM     | 0.600  | 0.441   | 0.063 | 0.506   | 101.134 | 0.843  | [-0.812, 2.011]  | 0.401    |
| 11 | POWL:PONM   | 0.030  | 0.001   | 0.001 | 0.002   | 26.046  | 0.734  | [-0.055, 0.115]  | 0.469    |

Note. Q: average of the point estimates. W: within-imputation variance. B: between-imputation variance. T: total variance. df: degrees of freedom. CI: confidence interval.

### 2.3. The correlations between Task volume (TV) of the task categories and MRE controlling other variables

#### 2.3.1. A sample model fitting and results with one of the imputed datasets

```
lme <- lmer( TV_Medication ~ (MRE + ShiftType + Mood_Score_Pre + NASATLX_Score_Pre)^2 + (1|Site) + (1|Subject), data =
subset(data.imp, Set == 1))
```

```
# Variables:
```

```
# TV_Medication: Task volume of medication tasks.
```

```
# MREO: MRE occurrence. Binary variable.
```

```
# ST: Shift type – day shift or night shift.
```

```
# POWL: Pre-observation workload.
```

```
# PONM: Pre-observation negative mood.
```

```
# Site: Three data collection sites (ICUs). Random variable.
```

```
# Subject: Nurse participants. Random variable.
```

```
# Input data: The first (Set == 1) of the thirty-five imputed datasets (data.imp).
```

```
Linear mixed model fit by REML
```

```
t-tests use Satterthwaite approximations to degrees of freedom ['lmerMod']
```

```
Formula: TV_Medication ~ (MREO + ST + POWL + PONM)^2 + (1 | Site) + (1 | Subject)
```

```
Data: subset(data.imp, Set == 1)
```

```
REML criterion at convergence: 855.7
```

```
Scaled residuals:
```

|  | Min      | 1Q       | Median   | 3Q      | Max     |
|--|----------|----------|----------|---------|---------|
|  | -1.74862 | -0.54370 | -0.05778 | 0.53125 | 2.91469 |

```
Random effects:
```

| Groups   | Name        | Variance | Std.Dev. |
|----------|-------------|----------|----------|
| Subject  | (Intercept) | 12.14    | 3.484    |
| Site     | (Intercept) | 13.96    | 3.737    |
| Residual |             | 44.51    | 6.671    |

```
Number of obs: 124, groups: subject, 86; site, 3
```

```
Fixed effects:
```

|             | Estimate | Std. Error | df         | t value | Pr(> t ) |
|-------------|----------|------------|------------|---------|----------|
| (Intercept) | 1.210319 | 2.444691   | 2.230000   | 0.495   | 0.6650   |
| MREO        | 3.801898 | 1.994063   | 109.780000 | 1.907   | 0.0592 . |
| ST          | 5.208564 | 2.128788   | 96.200000  | 2.447   | 0.0162 * |

```

POWL      0.256495   0.119194 109.550000   2.152   0.0336 *
PONM      -0.022775   0.083014 106.100000  -0.274   0.7843
MREO:ST   8.928208   3.982813 110.680000   2.242   0.0270 *
MREO:POWL -0.227056   0.193861 103.690000  -1.171   0.2442
MREO:PONM 0.075862   0.121698  93.390000   0.623   0.5346
ST:POWL   0.144787   0.216208  94.660000   0.670   0.5047
ST:PONM   0.267351   0.147064 103.870000   1.818   0.0720 .
POWL:PONM -0.002179   0.005080 111.210000  -0.429   0.6689

```

---  
Signif. codes: 0 '\*\*\*' 0.001 '\*\*' 0.01 '\*' 0.05 '.' 0.1 ' ' 1

Correlation of Fixed Effects:

```

(Intr) MREO  ST    POWL  PONM  MREO:S  MREO:POW  MREO:PON  ST:POW  ST:PON
MREO      0.200
ST         0.297  0.308
POWL      -0.116 -0.092 -0.072
PONM       0.147  0.364  0.363  0.059
MREO:ST    0.140  0.608  0.431  0.137  0.393
MREO:POWL -0.070 -0.173  0.170  0.434  0.045  0.086
MREO:PONM  0.117  0.243  0.267  0.011  0.508  0.307  0.028
ST:POWL   -0.057  0.089 -0.193  0.535 -0.017 -0.057 -0.006  -0.026
ST:PONM   0.130  0.305  0.302  0.018  0.659  0.317  0.011  0.143  -0.039
POWL:PONM -0.047 -0.071 -0.111  0.041 -0.093 -0.104  0.049  -0.267  0.197 -0.263

```

### 2.3.2. Results from the same model fittings for the 35 imputed datasets combined with Rubin's rule

The following table only presents the effects of MRE on TVs of the 12 task categories. These effects were tested in separate models similar to the one presented in 2.3.1.

| Task Categories         | Q      | W      | B     | T      | df      | t      | 95% CI           | p        |
|-------------------------|--------|--------|-------|--------|---------|--------|------------------|----------|
| TV_Medication           | 3.507  | 4.171  | 0.475 | 4.659  | 105.512 | 1.625  | [-0.773, 7.787]  | 0.107    |
| TV_Direct_Patient_Care  | 10.817 | 13.564 | 0.511 | 14.090 | 116.927 | 2.882  | [ 3.383, 18.251] | 0.005 ** |
| TV_Documentation_Review | 2.566  | 1.596  | 0.049 | 1.646  | 117.904 | 2.000  | [ 0.025, 5.106]  | 0.048 *  |
| TV_Administration       | -0.051 | 0.049  | 0.001 | 0.050  | 120.143 | -0.227 | [-0.493, 0.391]  | 0.821    |
| TV_Observation          | 1.343  | 3.545  | 0.288 | 3.841  | 110.474 | 0.685  | [-2.541, 5.226]  | 0.495    |
| TV_Conversational       | 5.014  | 13.572 | 0.797 | 14.393 | 113.84  | 1.322  | [-2.501, 12.53]  | 0.189    |
| TV_Assistance           | 0.232  | 0.059  | 0.003 | 0.062  | 115.91  | 0.937  | [-0.259, 0.724]  | 0.351    |
| TV_Teaching_Learning    | -0.394 | 0.207  | 0.010 | 0.217  | 115.699 | -0.846 | [-1.318, 0.529]  | 0.399    |

|                   |        |       |       |       |         |        |                 |       |
|-------------------|--------|-------|-------|-------|---------|--------|-----------------|-------|
| TV_Housekeeping   | 0.609  | 0.152 | 0.002 | 0.154 | 120.361 | 1.552  | [-0.168, 1.386] | 0.123 |
| TV_Transportation | 0.099  | 0.014 | 0.002 | 0.016 | 105.648 | 0.782  | [-0.153, 0.351] | 0.436 |
| TV_Personal       | -0.035 | 0.095 | 0.004 | 0.099 | 115.584 | -0.111 | [-0.660, 0.59]  | 0.912 |
| TV_Miscellaneous  | 0.970  | 0.460 | 0.030 | 0.491 | 112.912 | 1.384  | [-0.419, 2.359] | 0.169 |

Note. Q: average of the point estimates. W: within-imputation variance. B: between-imputation variance. T: total variance. df: degrees of freedom. CI: confidence interval.

The following table presents the effects of MRE on TVs of the individual tasks within medication tasks category.

| Medication Tasks                   | Q      | W     | B     | T     | df      | t      | 95% CI          | p        |
|------------------------------------|--------|-------|-------|-------|---------|--------|-----------------|----------|
| TV_Medication_Documentation_Review | 1.099  | 0.286 | 0.008 | 0.293 | 118.534 | 2.029  | [ 0.027, 2.172] | 0.045 *  |
| TV_Prep_Admin_Medications          | 0.206  | 0.248 | 0.012 | 0.260 | 115.527 | 0.403  | [-0.804, 1.216] | 0.687    |
| TV_IV_Fluid_Management             | 0.782  | 0.468 | 0.068 | 0.538 | 100.775 | 1.066  | [-0.673, 2.237] | 0.289    |
| TV_Obtain_Confirm_Medications      | 0.820  | 0.081 | 0.003 | 0.084 | 117.794 | 2.835  | [ 0.247, 1.393] | 0.005 ** |
| TV_Infusion_Pumps                  | 0.464  | 0.461 | 0.016 | 0.477 | 117.369 | 0.671  | [-0.904, 1.832] | 0.503    |
| TV_IV_Medications                  | -0.032 | 0.187 | 0.009 | 0.196 | 115.675 | -0.072 | [-0.909, 0.845] | 0.943    |

Note. Q: average of the point estimates. W: within-imputation variance. B: between-imputation variance. T: total variance. df: degrees of freedom. CI: confidence interval.

#### 2.4. Percentage of time (PT) spent on tasks

A sample model fitting is not presented in this section as the models were similar to the one presented in 2.3.1. The following table only presents the effects of MRE on PTs of the 12 task categories. These effects were tested in separate models similar to the one presented in 2.3.1.

| Task Categories         | Q      | W      | B      | T      | df      | t      | 95% CI          | p       |
|-------------------------|--------|--------|--------|--------|---------|--------|-----------------|---------|
| PT_Medications          | 0.019  | <0.001 | <0.001 | <0.001 | 107.040 | 1.350  | [-0.009, 0.047] | 0.180   |
| PT_Direct_Patient_Care  | 0.044  | <0.001 | <0.001 | <0.001 | 118.318 | 2.095  | [ 0.002, 0.086] | 0.038 * |
| PT_Documentation_Review | -0.003 | <0.001 | <0.001 | <0.001 | 117.679 | -0.147 | [-0.038, 0.033] | 0.884   |
| PT_Administration       | -0.003 | <0.001 | <0.001 | <0.001 | 119.581 | -1.068 | [-0.008, 0.002] | 0.288   |
| PT_Observation          | -0.005 | <0.001 | <0.001 | <0.001 | 103.456 | -0.524 | [-0.026, 0.015] | 0.601   |
| PT_Conversational       | -0.041 | 0.001  | <0.001 | 0.001  | 116.370 | -1.597 | [-0.092, 0.010] | 0.113   |
| PT_Assistance           | 0.003  | <0.001 | <0.001 | <0.001 | 120.607 | 1.388  | [-0.001, 0.006] | 0.168   |
| PT_Teaching_Learning    | 0.003  | <0.001 | <0.001 | <0.001 | 114.394 | 0.258  | [-0.018, 0.024] | 0.797   |
| PT_Housekeeping         | 0.004  | <0.001 | <0.001 | <0.001 | 117.745 | 1.160  | [-0.003, 0.010] | 0.248   |
| PT_Transportation       | 0.002  | <0.001 | <0.001 | <0.001 | 78.330  | 0.945  | [-0.003, 0.007] | 0.348   |
| PT_Personal             | -0.014 | <0.001 | <0.001 | <0.001 | 117.280 | -1.303 | [-0.036, 0.008] | 0.195   |
| PT_Miscellaneous        | <0.001 | <0.001 | <0.001 | <0.001 | 117.135 | -0.010 | [-0.017, 0.016] | 0.992   |

Note. Q: average of the point estimates. W: within-imputation variance. B: between-imputation variance. T: total variance. df: degrees of freedom. CI: confidence interval.

The following table presents the effects of MRE on PTs of the individual tasks within medication tasks category.

| Medication Tasks                    | Q      | W      | B      | T      | df      | t      | 95% CI          | p       |
|-------------------------------------|--------|--------|--------|--------|---------|--------|-----------------|---------|
| PT_Medications_Documentation_Review | 0.009  | <0.001 | <0.001 | <0.001 | 110.020 | 1.497  | [-0.003, 0.021] | 0.137   |
| PT_Prep_Admin_Medications           | 0.002  | <0.001 | <0.001 | <0.001 | 118.349 | 0.300  | [-0.008, 0.011] | 0.765   |
| PT_IV_Fluid_Management              | -0.001 | <0.001 | <0.001 | <0.001 | 114.107 | -0.152 | [-0.011, 0.009] | 0.880   |
| PT_Obtain_Confirm_Medications       | 0.010  | <0.001 | <0.001 | <0.001 | 119.104 | 2.443  | [ 0.002, 0.017] | 0.016 * |
| PT_Infusion_Pumps                   | <0.001 | <0.001 | <0.001 | <0.001 | 117.842 | 0.055  | [-0.005, 0.006] | 0.956   |

|                   |        |        |        |        |         |        |                 |       |
|-------------------|--------|--------|--------|--------|---------|--------|-----------------|-------|
| PT_IV_Medications | -0.001 | <0.001 | <0.001 | <0.001 | 118.660 | -0.646 | [-0.005, 0.002] | 0.520 |
|-------------------|--------|--------|--------|--------|---------|--------|-----------------|-------|

Note. Q: average of the point estimates. W: within-imputation variance. B: between-imputation variance. T: total variance. df: degrees of freedom. CI: confidence interval.

### 3. RQ4: MREs and Change in Workload and Negative Mood

#### 3.1. Pre-observation workload and negative mood

See section “1. RQ1: Frequency of MRE-Containing Observations”.

#### 3.2. Change in workload

##### 3.2.1. A sample model fitting and results with one of the imputed datasets

```
lme <- lmer( ChangeWL ~ (MREO + ST + POWL + PONM)^2 + (1|Site) + (1|Subject), data = subset(data.imp, Set == 1))
```

# Variables:

```
# ChangWL: Change in workload.
# MREO: MRE occurrence. Binary variable.
# ST: Shift type – day shift or night shift.
# POWL: Pre-observation workload.
# PONM: Pre-observation negative mood.
# Site: Three data collection sites (ICUs). Random variable.
# Subject: Nurse participants. Random variable.
# Input data: The first (Set == 1) of the thirty-five imputed datasets (data.imp).
```

```
Linear mixed model fit by REML
t-tests use Satterthwaite approximations to degrees of freedom ['lmerMod']
Formula: ChangeWL ~ (MREO + ST + POWL + PONM)^2 + (1 | Site) + (1 | Subject)
Data: subset(data.imp, Set == 1)
```

REML criterion at convergence: 851.2

Scaled residuals:

|  | Min      | 1Q       | Median  | 3Q      | Max     |
|--|----------|----------|---------|---------|---------|
|  | -2.11562 | -0.48082 | 0.04792 | 0.41302 | 2.60294 |

Random effects:

| Groups   | Name        | Variance | Std.Dev. |
|----------|-------------|----------|----------|
| Subject  | (Intercept) | 23.116   | 4.808    |
| Site     | (Intercept) | 1.786    | 1.337    |
| Residual |             | 35.248   | 5.937    |

Number of obs: 124, groups: Subject, 86; Site, 3

Fixed effects:

|             | Estimate  | Std. Error | df         | t value | Pr(> t ) |
|-------------|-----------|------------|------------|---------|----------|
| (Intercept) | 3.114919  | 1.361688   | 4.050000   | 2.288   | 0.0833 . |
| MREO        | 3.822270  | 1.937729   | 104.530000 | 1.973   | 0.0512 . |
| ST          | 1.161603  | 2.151728   | 102.220000 | 0.540   | 0.5905   |
| POWL        | -0.225924 | 0.118285   | 112.790000 | -1.910  | 0.0587 . |
| PONM        | 0.187067  | 0.083029   | 110.480000 | 2.253   | 0.0262 * |
| MREO:ST     | 8.845595  | 3.938725   | 111.350000 | 2.246   | 0.0267 * |
| MREO:POWL   | -0.219480 | 0.186543   | 91.720000  | -1.177  | 0.2424   |
| MREO:PONM   | -0.074534 | 0.115620   | 80.580000  | -0.645  | 0.5210   |
| ST:POWL     | -0.056833 | 0.220016   | 103.100000 | -0.258  | 0.7967   |
| ST:PONM     | 0.017977  | 0.148039   | 105.350000 | 0.121   | 0.9036   |
| POWL:PONM   | 0.009085  | 0.004938   | 100.430000 | 1.840   | 0.0688 . |

---

Signif. codes: 0 '\*\*\*' 0.001 '\*\*' 0.01 '\*' 0.05 '.' 0.1 ' ' 1

Correlation of Fixed Effects:

|           | (Intr) | MREO   | ST     | POWL  | PONM   | MREO:S | MREO:POW | MREO:PON | ST:POW | ST:PON |
|-----------|--------|--------|--------|-------|--------|--------|----------|----------|--------|--------|
| MREO      | 0.338  |        |        |       |        |        |          |          |        |        |
| ST        | 0.511  | 0.290  |        |       |        |        |          |          |        |        |
| POWL      | -0.196 | -0.071 | -0.086 |       |        |        |          |          |        |        |
| PONM      | 0.248  | 0.364  | 0.342  | 0.093 |        |        |          |          |        |        |
| MREO:ST   | 0.251  | 0.616  | 0.413  | 0.146 | 0.405  |        |          |          |        |        |
| MREO:POWL | -0.111 | -0.138 | 0.168  | 0.400 | 0.069  | 0.114  |          |          |        |        |
| MREO:PONM | 0.196  | 0.248  | 0.252  | 0.026 | 0.495  | 0.327  | 0.037    |          |        |        |
| ST:POWL   | -0.118 | 0.102  | -0.210 | 0.569 | 0.018  | -0.040 | -0.016   | -0.014   |        |        |
| ST:PONM   | 0.215  | 0.306  | 0.285  | 0.049 | 0.674  | 0.325  | 0.032    | 0.134    | 0.007  |        |
| POWL:PONM | -0.069 | -0.061 | -0.102 | 0.016 | -0.089 | -0.111 | 0.048    | -0.272   | 0.192  | -0.246 |

3.2.2. Results from the same model fittings for the 35 imputed datasets combined with Rubin's rule

The following table presents results when MREO was effects coded with weights -0.5 (absence of MRE) and 0.5 (presence of MRE). ST was also effects coded with weights -0.5 (day shift) and 0.5 (night shift).

|   | Variable    | Q      | W     | B     | T     | df      | t      | 95% CI           | p       |
|---|-------------|--------|-------|-------|-------|---------|--------|------------------|---------|
| 1 | (Intercept) | 3.002  | 1.849 | 0.206 | 2.060 | 105.909 | 2.091  | [ 0.156, 5.847]  | 0.039 * |
| 2 | MREO        | 4.567  | 3.706 | 0.708 | 4.434 | 94.370  | 2.169  | [ 0.386, 8.747]  | 0.033 * |
| 3 | ST          | 2.098  | 3.979 | 0.419 | 4.410 | 106.803 | 0.999  | [-2.065, 6.261]  | 0.320   |
| 4 | POWL        | -0.317 | 0.013 | 0.003 | 0.016 | 86.265  | -2.520 | [-0.566, -0.067] | 0.014 * |



|    |           |        |        |        |        |         |        |                  |         |
|----|-----------|--------|--------|--------|--------|---------|--------|------------------|---------|
| 5  | PONM      | 0.170  | 0.007  | 0.003  | 0.010  | 67.775  | 1.720  | [-0.027, 0.367]  | 0.090   |
| 6  | MREO:ST   | 8.646  | 14.293 | 1.732  | 16.075 | 104.424 | 2.157  | [ 0.696, 16.597] | 0.033 * |
| 7  | MREO:POWL | -0.280 | 0.033  | 0.013  | 0.047  | 70.112  | -1.300 | [-0.711, 0.150]  | 0.198   |
| 8  | MREO:PONM | 0.074  | 0.018  | 0.012  | 0.031  | 52.255  | 0.425  | [-0.276, 0.425]  | 0.673   |
| 9  | ST:POWL   | 0.009  | 0.041  | 0.009  | 0.051  | 89.357  | 0.040  | [-0.440, 0.458]  | 0.969   |
| 10 | ST:PONM   | 0.182  | 0.021  | 0.013  | 0.034  | 57.154  | 0.991  | [-0.186, 0.551]  | 0.326   |
| 11 | POWL:PONM | 0.005  | <0.001 | <0.001 | <0.001 | 22.883  | 0.508  | [-0.015, 0.025]  | 0.617   |

Note. Q: average of the point estimates. W: within-imputation variance. B: between-imputation variance. T: total variance. df: degrees of freedom. CI: confidence interval.

The following table presents results when ST was dummy coded with night shift as the reference level.

|    | Variable    | Q      | W      | B      | T      | df      | t      | 95% CI            | p       |
|----|-------------|--------|--------|--------|--------|---------|--------|-------------------|---------|
| 1  | (Intercept) | 4.051  | 4.117  | 0.329  | 4.456  | 110.643 | 1.919  | [-0.132, 8.234]   | 0.058   |
| 2  | MREO        | 8.890  | 11.662 | 1.545  | 13.251 | 102.746 | 2.442  | [ 1.670, 16.110]  | 0.016 * |
| 3  | ST          | -2.098 | 3.979  | 0.419  | 4.410  | 106.803 | -0.999 | [-6.261, 2.065]   | 0.320   |
| 4  | POWL        | -0.312 | 0.036  | 0.002  | 0.037  | 115.747 | -1.617 | [-0.694, 0.070]   | 0.109   |
| 5  | PONM        | 0.261  | 0.019  | 0.004  | 0.023  | 90.364  | 1.705  | [-0.043, 0.565]   | 0.092   |
| 6  | MREO:ST     | -8.646 | 14.293 | 1.732  | 16.075 | 104.424 | -2.157 | [-16.597, -0.696] | 0.033 * |
| 7  | MREO:POWL   | -0.280 | 0.033  | 0.013  | 0.047  | 70.112  | -1.300 | [-0.711, 0.150]   | 0.198   |
| 8  | MREO:PONM   | 0.074  | 0.018  | 0.012  | 0.031  | 52.255  | 0.425  | [-0.276, 0.425]   | 0.673   |
| 9  | ST:POWL     | -0.009 | 0.041  | 0.009  | 0.051  | 89.357  | -0.040 | [-0.458, 0.440]   | 0.969   |
| 10 | ST:PONM     | -0.182 | 0.021  | 0.013  | 0.034  | 57.154  | -0.991 | [-0.551, 0.186]   | 0.326   |
| 11 | POWL:PONM   | 0.005  | <0.001 | <0.001 | <0.001 | 22.883  | 0.508  | [-0.015, 0.025]   | 0.617   |

Note. Q: average of the point estimates. W: within-imputation variance. B: between-imputation variance. T: total variance. df: degrees of freedom. CI: confidence interval.

### 3.3. Change in negative mood

A sample model fitting is not presented in this section as the models were similar to the one presented in 3.1.1. The following table presents the results from the same model fittings for the 35 imputed datasets combined with Rubin's rule. MREO was effects coded with weights -0.5 (absence of MRE) and 0.5 (presence of MRE). ST was also effects coded with weights -0.5 (day shift) and 0.5 (night shift).

|    | Variable    | Q      | W      | B      | T      | df      | t      | 95% CI           | p     |
|----|-------------|--------|--------|--------|--------|---------|--------|------------------|-------|
| 1  | (Intercept) | 2.263  | 1.752  | 0.353  | 2.115  | 92.921  | 1.556  | [-0.625, 5.151]  | 0.123 |
| 2  | MREO        | 1.108  | 6.558  | 1.429  | 8.028  | 90.781  | 0.391  | [-4.521, 6.736]  | 0.697 |
| 3  | ST          | 2.514  | 6.668  | 1.332  | 8.038  | 93.183  | 0.887  | [-3.116, 8.145]  | 0.377 |
| 4  | POWL        | -0.093 | 0.022  | 0.005  | 0.027  | 92.295  | -0.569 | [-0.416, 0.231]  | 0.571 |
| 5  | PONM        | -0.030 | 0.011  | 0.005  | 0.017  | 66.513  | -0.231 | [-0.288, 0.229]  | 0.818 |
| 6  | MREO:ST     | 7.613  | 25.307 | 2.934  | 28.324 | 105.214 | 1.431  | [-2.939, 18.166] | 0.156 |
| 7  | MREO:POWL   | -0.143 | 0.060  | 0.022  | 0.083  | 73.561  | -0.498 | [-0.717, 0.431]  | 0.620 |
| 8  | MREO:PONM   | 0.104  | 0.032  | 0.021  | 0.054  | 54.191  | 0.447  | [-0.361, 0.568]  | 0.657 |
| 9  | ST:POWL     | -0.016 | 0.070  | 0.018  | 0.089  | 85.042  | -0.053 | [-0.609, 0.577]  | 0.958 |
| 10 | ST:PONM     | -0.018 | 0.035  | 0.028  | 0.064  | 47.976  | -0.070 | [-0.525, 0.49]   | 0.944 |
| 11 | POWL:PONM   | 0.001  | <0.001 | <0.001 | <0.001 | 23.433  | 0.103  | [-0.025, 0.027]  | 0.919 |

Note. Q: average of the point estimates. W: within-imputation variance. B: between-imputation variance. T: total variance. df: degrees of freedom. CI: confidence interval.
